# Supplementary material
Source: Research Square preprint supplement (doi:10.21203/rs.3.rs-10356774/v1)
Supplement: Supplementary file 1 [file a985d42b5ff83eb53ecf30e2.docx]

**STROBE Checklist for Cohort Studies**

**Manuscript:** High Admission Systemic Inflammation Response Index as an Independent Predictor of In-Hospital Adverse Events Among Patients with Acute Heart Failure: A Prospective Cohort Study

**Completed reporting checklist**

| **Item** | **Topic** | **STROBE recommendation** | **Reported in manuscript** | **Page** |
| --- | --- | --- | --- | --- |
| 1 | Title and abstract | Indicate the study design in the title or abstract and provide an informative, balanced summary. | Title and Abstract | 1-2 |
| 2 | Background/rationale | Explain the scientific background and rationale. | Background | 2-3 |
| 3 | Objectives | State specific objectives, including prespecified hypotheses. | End of Background | 3 |
| 4 | Study design | Present key elements of study design early. | Methods - Study design and setting | 3-4 |
| 5 | Setting | Describe setting, locations, and relevant dates. | Methods - Study design and setting | 3-4 |
| 6a | Participants | Give eligibility criteria and sources and methods of participant selection and follow-up. | Methods - Participants; Outcome assessment | 4-5 |
| 6b | Matched studies | Give matching criteria and numbers of exposed/unexposed participants. | Not applicable; no matching was used. | - |
| 7 | Variables | Clearly define outcomes, exposures, predictors, potential confounders, and effect modifiers. | Methods - Data collection, Outcome assessment, Statistical analysis | 4-6 |
| 8 | Data sources/measurement | For each variable, give data sources and measurement methods. | Methods - Data collection and SIRI calculation; Outcome assessment | 4-6 |
| 9 | Bias | Describe efforts to address potential sources of bias. | Consecutive enrollment, admission blood sampling, prespecified outcomes; limitations | 3-6, 13-14 |
| 10 | Study size | Explain how study size was determined. | Methods - Sample size and recruitment | 4 |
| 11 | Quantitative variables | Explain how quantitative variables were handled and why groupings were chosen. | Methods - SIRI calculation; Statistical analysis | 4-6 |
| 12a | Statistical methods | Describe all statistical methods, including control of confounding. | Methods - Statistical analysis | 6 |
| 12b | Subgroups/interactions | Describe methods used for subgroup or interaction analyses. | Individual component analyses described; no interaction analysis was planned. | 6, 10-11 |
| 12c | Missing data | Explain how missing data were addressed. | Complete analyzed cohort reported; essential complete data required for inclusion. | 4, 7 |
| 12d | Loss to follow-up | Explain how loss to follow-up was addressed. | All participants completed in-hospital observation. | 7 |
| 12e | Sensitivity analyses | Describe sensitivity analyses. | Continuous-SIRI multivariable sensitivity analysis | 6, 10 |
| 13a | Participants | Report numbers at each stage of the study. | 102 participants enrolled and analyzed. | 7 |
| 13b | Non-participation | Give reasons for non-participation at each stage. | Eligibility/exclusion criteria reported; stage-specific screening counts were not recorded in the source study. | 4 |
| 13c | Flow diagram | Consider use of a flow diagram. | Not included because stage-specific screening counts were unavailable; all 102 enrolled participants were analyzed. | 7 |
| 14a | Descriptive data | Give participant characteristics and potential confounders. | Results and Table 1 | 7-8 |
| 14b | Missing data by variable | Indicate number of participants with missing data for each variable. | No variable-specific missingness was reported in the final analyzed cohort. | 7 |
| 14c | Follow-up time | Summarize follow-up time. | Followed until discharge, death, or 30 hospital days; no post-discharge follow-up. | 5 |
| 15 | Outcome data | Report numbers of outcome events or summary measures. | Results and Table 2 | 8 |
| 16a | Main results | Give unadjusted and adjusted estimates with precision and identify adjusted confounders. | Results, Tables 3 and 5 | 8-10 |
| 16b | Category boundaries | Report category boundaries when continuous variables are categorized. | SIRI cut-off 4.295 reported in Methods and Results. | 5, 8-9 |
| 16c | Absolute risk translation | Consider translating relative estimates into absolute risk. | Absolute event proportions reported for high- and low-SIRI groups. | 8-9 |
| 17 | Other analyses | Report subgroup, interaction, and sensitivity analyses. | Continuous-SIRI sensitivity analysis and individual component analyses | 10-11 |
| 18 | Key results | Summarize key results with reference to study objectives. | Discussion - Principal findings | 11 |
| 19 | Limitations | Discuss study limitations, direction and magnitude of potential bias or imprecision. | Discussion - Strengths and limitations | 13-14 |
| 20 | Interpretation | Provide a cautious overall interpretation considering objectives, limitations, multiplicity, and other evidence. | Discussion and Conclusions | 11-14 |
| 21 | Generalisability | Discuss external validity. | Clinical implications; Strengths and limitations | 13-14 |
| 22 | Funding | Give funding source and role of funders. | Declarations - Funding | 14 |

Note: Page numbers refer to 01_Main_Manuscript_Blinded.docx. Items unavailable in the source thesis are explicitly identified rather than inferred.
