# Supplementary material
Source: Research Square preprint supplement (doi:10.21203/rs.3.rs-10356774/v1)
Supplement: Supplementary file 2 [file dad69ce22d42245a72b1ee33.docx]

Tables

*High Admission Systemic Inflammation Response Index as an Independent Predictor of In-Hospital Adverse Events Among Patients with Acute Heart Failure: A Prospective Cohort Study*

**Table 1. Baseline characteristics of the study population**

| **Characteristic** | **Overall (n=102)** |
| --- | --- |
| Age, years | 58.69 ± 12.27 |
| Body mass index, kg/m² | 24.10 (22.02-26.98) |
| Systolic blood pressure, mmHg | 122.15 ± 24.18 |
| Diastolic blood pressure, mmHg | 77.64 ± 16.98 |
| Serum creatinine, mg/dL | 1.09 (0.92-1.64) |
| eGFR, mL/min/1.73 m² | 70.50 (41.78-86.69) |
| AST, U/L | 43.50 (27.25-102.75) |
| ALT, U/L | 28.00 (18.00-53.00) |
| Neutrophils, ×10³/µL | 8.30 (5.95-11.75) |
| Monocytes, ×10³/µL | 0.80 (0.55-0.96) |
| Lymphocytes, ×10³/µL | 1.48 (1.05-1.96) |
| SIRI | 3.97 (2.36-6.63) |
| Male sex | 74 (72.5) |
| Hypertension | 46 (45.1) |
| Diabetes mellitus | 30 (29.4) |
| AHF due to acute coronary syndrome | 57 (55.9) |
| AHF due to non-acute coronary syndrome | 45 (44.1) |
| Cardiogenic shock at admission | 24 (23.5) |
| Infection at admission | 30 (29.4) |
| Referral from another hospital | 68 (66.7) |
| Positive-pressure ventilation at admission | 2 (2.0) |
| LVEF ≤40% | 52 (51.0) |
| TAPSE ≤17 mm | 25 (24.5) |

Note: Data are mean ± standard deviation, median (interquartile range), or n (%). AHF, acute heart failure; ALT, alanine aminotransferase; AST, aspartate aminotransferase; eGFR, estimated glomerular filtration rate; LVEF, left ventricular ejection fraction; SIRI, systemic inflammation response index; TAPSE, tricuspid annular plane systolic excursion.

**Table 2. Distribution of individual in-hospital adverse events**

| **Adverse event** | **n** | **%** |
| --- | --- | --- |
| Hemodynamic deterioration | 23 | 22.5 |
| Clinically significant arrhythmia | 14 | 13.7 |
| Acute kidney dysfunction | 11 | 10.8 |
| Hospital-acquired pneumonia | 9 | 8.8 |
| All-cause in-hospital mortality | 9 | 8.8 |
| Positive-pressure ventilation | 4 | 3.9 |
| Liver dysfunction | 2 | 2.0 |
| Cerebral dysfunction | 2 | 2.0 |

Note: One participant could experience more than one component; therefore, component frequencies exceed the number of participants with the composite outcome.

**Table 3. Predictive performance of admission SIRI and event rates by category**

| **Parameter** | **Value** | **Adverse event, n (%)** | **No adverse event, n (%)** | **OR (95% CI)** | **p value** |
| --- | --- | --- | --- | --- | --- |
| **ROC analysis** |  |  |  |  |  |
| Area under the ROC curve | 0.944 |  |  |  | <0.001 |
| 95% confidence interval | 0.902-0.986 |  |  |  |  |
| Optimal cut-off | 4.295 |  |  |  |  |
| **SIRI category** |  |  |  |  |  |
| High SIRI (≥4.295) | 45 (44.1%) | 38 (84.4) | 7 (15.6) | 71.93 (19.66-263.19) | <0.001 |
| Low SIRI (<4.295) | 57 (55.9%) | 4 (7.0) | 53 (93.0) | Reference | - |

Note: CI, confidence interval; OR, odds ratio; ROC, receiver operating characteristic; SIRI, systemic inflammation response index.

**Table 4. Multivariable predictors of in-hospital adverse events**

| **Variable** | **B** | **Adjusted OR** | **95% CI** | **p value** |
| --- | --- | --- | --- | --- |
| Body mass index | -0.125 | 0.883 | 0.711-1.095 | 0.257 |
| Systolic blood pressure | -0.028 | 0.972 | 0.917-1.032 | 0.360 |
| Diastolic blood pressure | 0.001 | 1.001 | 0.928-1.081 | 0.970 |
| Serum creatinine | 0.857 | 2.356 | 0.565-9.824 | 0.239 |
| eGFR | 0.007 | 1.007 | 0.959-1.056 | 0.784 |
| AST | 0.001 | 1.001 | 0.991-1.011 | 0.836 |
| ALT | 0.014 | 1.014 | 0.987-1.042 | 0.314 |
| AHF etiology | 0.364 | 1.439 | 0.188-11.025 | 0.726 |
| Cardiogenic shock at admission | 1.093 | 2.982 | 0.490-18.135 | 0.236 |
| Referral status | 0.127 | 1.136 | 0.177-7.294 | 0.893 |
| High SIRI (≥4.295) | 4.381 | 79.879 | 14.68-434.64 | <0.001 |

Note: AHF, acute heart failure; ALT, alanine aminotransferase; AST, aspartate aminotransferase; CI, confidence interval; eGFR, estimated glomerular filtration rate; OR, odds ratio; SIRI, systemic inflammation response index. Variables with p<0.25 in bivariable analysis and clinically relevant variables identified a priori were entered simultaneously.

**Table 5. Association between high SIRI and individual adverse-event components**

| **Outcome component** | **OR** | **95% CI** | **p value** |
| --- | --- | --- | --- |
| Clinically significant arrhythmia | 10.00 | 2.11-47.49 | <0.001 |
| Hemodynamic deterioration | 53.60 | 6.81-421.10 | <0.001 |
| Positive-pressure ventilation | NE | NE | 0.035 |
| Acute kidney dysfunction | 16.00 | 1.96-130.47 | 0.001 |
| Liver dysfunction | NE | NE | 0.192 |
| Cerebral dysfunction | NE | NE | 0.192 |
| Hospital-acquired pneumonia | 12.11 | 1.45-100.87 | 0.010 |
| All-cause in-hospital mortality | 5.10 | 1.21-25.73 | 0.041 |

Note: CI, confidence interval; NE, not estimable; OR, odds ratio; SIRI, systemic inflammation response index. Fisher exact testing was used when sparse cells prevented reliable OR estimation.
